# Supplementary material for: Critical Evaluation of Molecular Monitoring in Malaria Drug Efficacy Trials and Pitfalls of Length-Polymorphic Markers
Source: PubMed Central journal article supplement (PMC5192142; doi:10.1128/aac.01500-16), 2016-12-27
Supplement: AAC.01500-16_zac001175834s1.pdf [file AAC.01500-16_zac001175834s1.pdf]

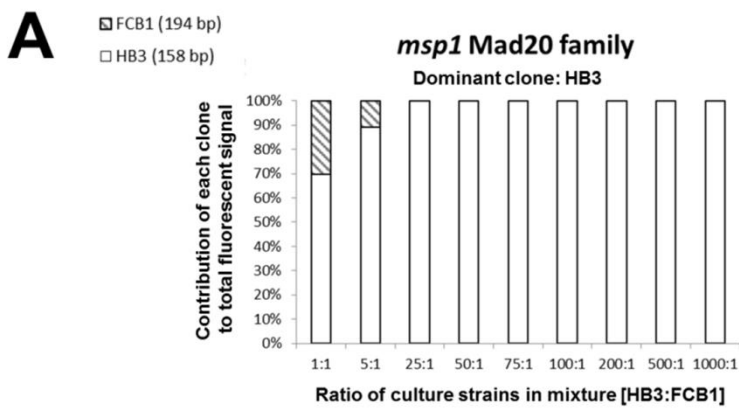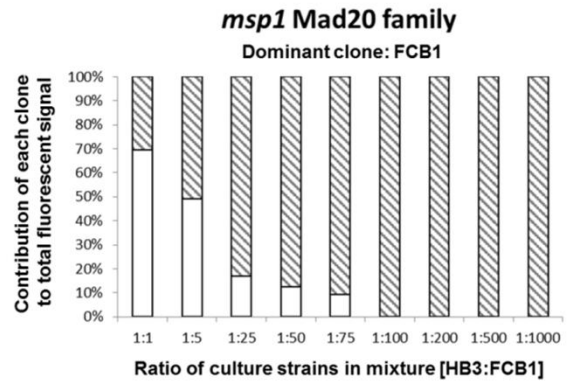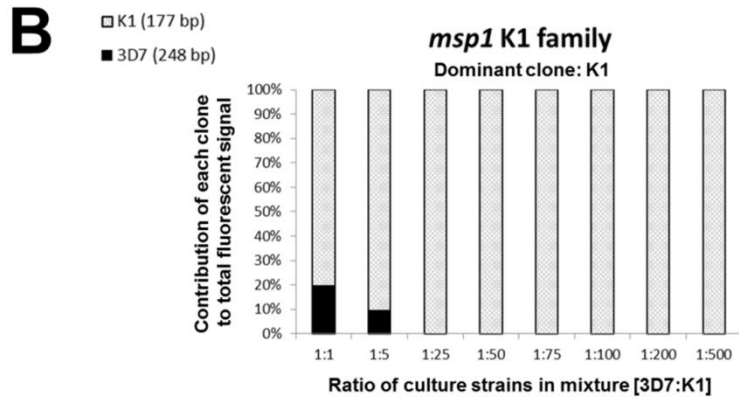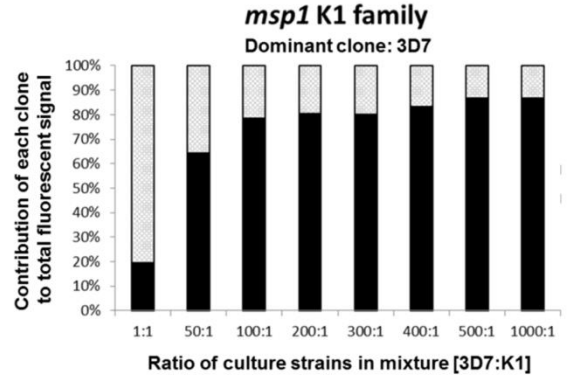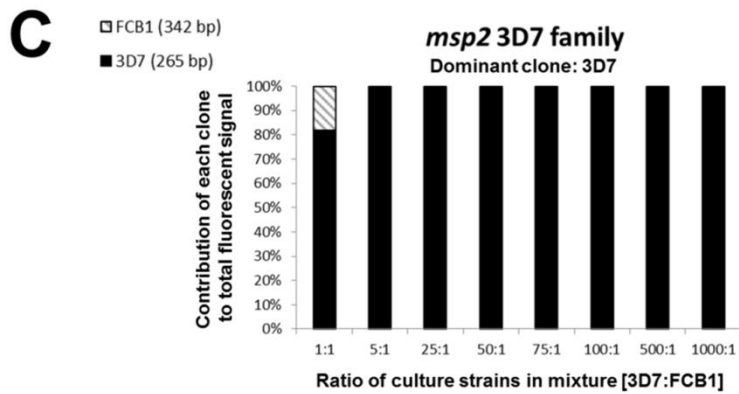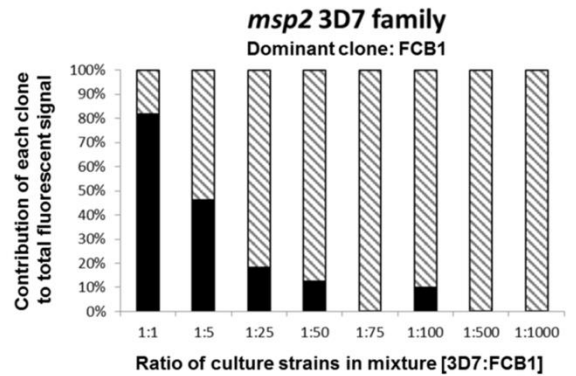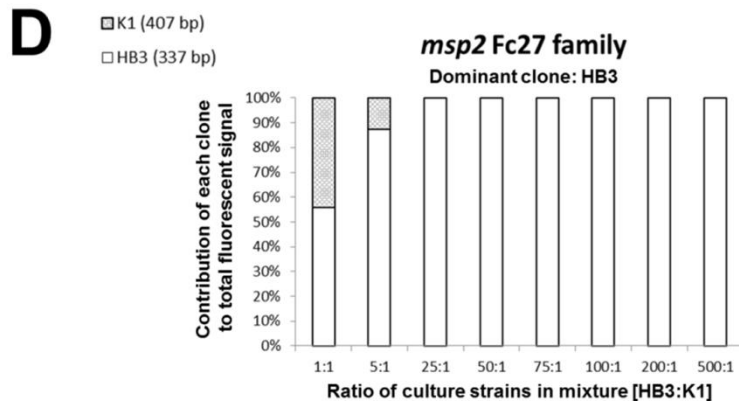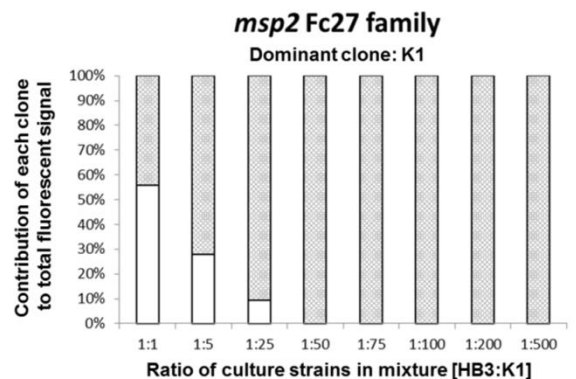

**Supplementary Figure S1: Proportion of *msp1* and *msp2* fluorescent signals detected during capillary electrophoresis for each clone in two culture strain-mixtures.** Mixed strains carried *msp1* or *msp2* alleles of the same allelic family: (A) Mad20-type *msp1* alleles, (B) K1-type *msp1* alleles, (C) 3D7-type *msp2* alleles, and (D) Fc27-type *msp2* alleles. The shorter allele was increasingly dominant in the left panels, the longer allele increasingly dominant in the right panels.

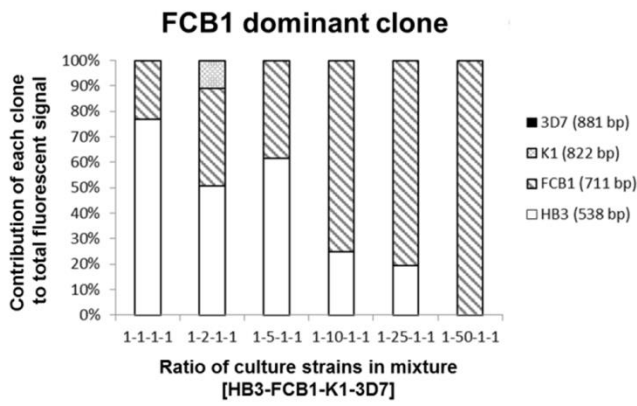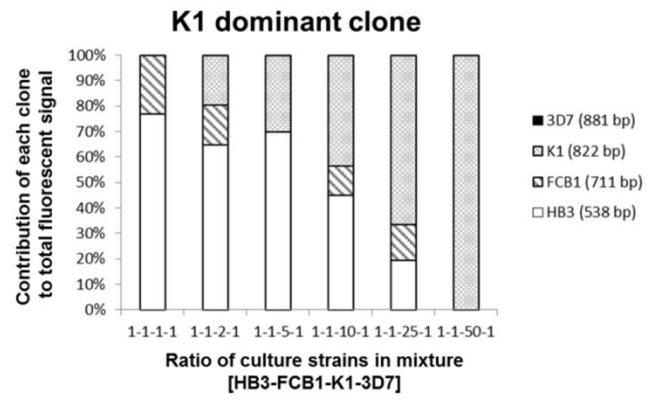

**Supplementary Figure S2:** Proportions of *glurp* fluorescent signal detected during capillary electrophoresis for each clone in a four culture strain-mixture, with clone FCB1 (2<sup>nd</sup>-shortest *glurp* allele, left panel) or clone 3D7 (2<sup>nd</sup>-longest *glurp* allele, right panel) as increasingly dominant clone.

## Supplementary Table S1: PCR reaction mixes and thermocyclic profiles

### A) PCR genotyping *glurp*

| Primary PCR reaction mix and thermo profile | Reagents           | Concentration | Volume  | Temperature | Time  | Cycles |
|---------------------------------------------|--------------------|---------------|---------|-------------|-------|--------|
|                                             | ddH <sub>2</sub> O |               | 25.5 µL | 94°C        | 5min  | 1x     |
|                                             | 10x Buffer B       | 10x           | 5.0 µL  | 94°C        | 1min  |        |
|                                             | dNTPs              | 2mM           | 5.0 µL  | 50°C        | 1min  | 25x    |
|                                             | MgCl <sub>2</sub>  | 25mM          | 4.0 µL  | 72°C        | 2min  |        |
|                                             | Primer G4          | 10µM          | 2.5 µL  | 72°C        | 10min | 1x     |
|                                             | Primer G5mod       | 10µM          | 2.5 µL  |             |       |        |
|                                             | FIRE Pol®          |               | 0.5 µL  |             |       |        |
|                                             | DNA                |               | 5 µL    |             |       |        |
|                                             |                    |               | 50 µL   |             |       |        |

  

| Nested PCR reaction mix and thermo profile | Reagents           | Concentration | Volume  | Temperature | Time  | Cycles |
|--------------------------------------------|--------------------|---------------|---------|-------------|-------|--------|
|                                            | ddH <sub>2</sub> O |               | 31.5 µL | 94°C        | 5min  | 1x     |
|                                            | 10x Buffer B       | 10x           | 5.0 µL  | 94°C        | 1min  |        |
|                                            | dNTPs              | 2mM           | 5.0 µL  | 58°C        | 1min  | 30x    |
|                                            | MgCl <sub>2</sub>  | 25mM          | 3.0 µL  | 72°C        | 1min  |        |
|                                            | GNF                | 10µM          | 2.0 µL  | 72°C        | 10min | 1x     |
|                                            | G3                 | 10µM          | 2.0 µL  |             |       |        |
|                                            | FIRE Pol®          |               | 0.5 µL  |             |       |        |
|                                            | pPCR product       |               | 1 µL    |             |       |        |
|                                            |                    |               | 50 µL   |             |       |        |

FIRE Pol® (Solis BioDyne, England)

### B) PCR genotyping *msp1/2*

| Primary PCR reaction mix and thermo profile (duplex <i>msp1</i> & <i>msp2</i> ) | Reagents                      | Concentration | Volume  | Temperature | Time  | Cycles |
|---------------------------------------------------------------------------------|-------------------------------|---------------|---------|-------------|-------|--------|
|                                                                                 | ddH <sub>2</sub> O            |               | 28.0 µL | 94°C        | 5min  | 1x     |
|                                                                                 | 10x Buffer B                  | 10x           | 5.0 µL  | 94°C        | 30sec |        |
|                                                                                 | dNTPs                         | 2mM           | 5.0 µL  | 54°C        | 1min  | 30x    |
|                                                                                 | MgCl <sub>2</sub>             | 25mM          | 4.0 µL  | 72°C        | 1min  |        |
|                                                                                 | Primer Mix M1/M2 <sup>a</sup> | 10µM          | 2.5 µL  | 72°C        | 5min  | 1x     |
|                                                                                 | FIRE Pol®                     |               | 0.5 µL  |             |       |        |
|                                                                                 | DNA                           |               | 5 µL    |             |       |        |
|                                                                                 |                               |               | 50 µL   |             |       |        |

<sup>a</sup> Primer mix: M1-OF/M1-OR/M2-OF/M2-OR

| <i>msp1</i> nested PCR reaction mix and thermo profile | Reagents                     | Concentration | Volume  | Temperature | Time  | Cycles |
|--------------------------------------------------------|------------------------------|---------------|---------|-------------|-------|--------|
|                                                        | ddH <sub>2</sub> O           |               | 32.5 µL | 94°C        | 5min  | 1x     |
|                                                        | 10x Buffer B                 | 10x           | 5.0 µL  | 94°C        | 30sec |        |
|                                                        | dNTPs                        | 2mM           | 5.0 µL  | 59°C        | 1min  | 30x    |
|                                                        | MgCl <sub>2</sub>            | 25mM          | 4.0 µL  | 72°C        | 1min  |        |
|                                                        | Primer Mix nPCR <sup>b</sup> | 10µM          | 2.0 µL  | 72°C        | 5min  | 1x     |
|                                                        | FIRE Pol®                    |               | 0.5 µL  |             |       |        |
|                                                        | pPCR product                 |               | 1 µL    |             |       |        |
|                                                        |                              |               | 50 µL   |             |       |        |

<sup>b</sup> Primer mix: M1-MF/M1-MR or M1-KF/M1-KR

| <i>msp2</i> nested PCR reaction mix and thermo profile | Reagents                     | Concentration | Volume  | Temperature | Time  | Cycles |
|--------------------------------------------------------|------------------------------|---------------|---------|-------------|-------|--------|
|                                                        | ddH <sub>2</sub> O           |               | 33.5 µL | 94°C        | 5min  | 1x     |
|                                                        | 10x Buffer B                 | 10x           | 5.0 µL  | 94°C        | 30sec |        |
|                                                        | dNTPs                        | 2mM           | 5.0 µL  | 50°C        | 45sec | 30x    |
|                                                        | MgCl <sub>2</sub>            | 25mM          | 3.0 µL  | 72°C        | 1min  |        |
|                                                        | Primer Mix nPCR <sup>c</sup> | 10µM          | 2.0 µL  | 72°C        | 10min | 1x     |
|                                                        | FIRE Pol®                    |               | 0.5 µL  |             |       |        |
|                                                        | pPCR product                 |               | 1 µL    |             |       |        |
|                                                        |                              |               | 50 µL   |             |       |        |

<sup>c</sup> Primer mix: M5/S-tail or N5/S-tail

## Supplementary Table S2: PCR primers

### A) glurp genotyping PCR

|             | Primer ID | T <sub>m</sub> | Sequence                                 | CG%  | nt | Reference      |
|-------------|-----------|----------------|------------------------------------------|------|----|----------------|
| primary PCR | G4        | 57.4°C         | 5'-acatgcaagtggtgatcc-3'                 | 44.4 | 18 |                |
|             | G5mod     | 64.2°C         | 5'-cagatggttgggagtaacggtt-3'             | 45.5 | 22 |                |
| nested PCR  | G3        | 64°C           | 5'-tgtaggtagaccgggtcttg-3'               | 52.4 | 21 |                |
|             | GNF       | 65.5°C         | (PET) 5'-tggtcacactgaacaattagattgatca-3' | 30   | 30 | Snounou (2002) |

### B) msp1 genotyping PCR

|              | Primer ID | T <sub>m</sub> | Sequence                                   | CG%  | nt | Reference      |
|--------------|-----------|----------------|--------------------------------------------|------|----|----------------|
| primary PCR  | M1-OF     | 61.9°C         | 5'-ctagaagcttagaagatgcagtattg-3'           | 37   | 27 | Snounou (2002) |
|              | M1-OR     | 61.1°C         | 5'-cttaaatagtattctaattcaagtgatca-3'        | 26.7 | 30 | Snounou (2002) |
| nested PCR   |           |                |                                            |      |    |                |
| Mad20 family | M1-MF     | 70.1°C         | Tail 5'-aaatgaaggaacaagtggaacagctgttac-3'  | 40   | 30 | Snounou (2002) |
|              | M1-MR     | 67.6°C         | (FAM) 5'-atctgaaggattgtacgtcttgaattacc-3'  | 36.7 | 30 | Snounou (2002) |
| K1 family    | M1-KF     | 65.3°C         | Tail 5'-aaatgaagaagaaattactacaaaagggtgc-3' | 30   | 30 | Snounou (2002) |
|              | M1-KR     | 83.2°C         | (NED) 5'-gcttgcacagctggaggcttgcaccaga-3'   | 60   | 30 | Snounou (2002) |

### C) msp2 genotyping PCR

|             | Primer ID | T <sub>m</sub> | Sequence                            | CG%  | nt | Reference          |
|-------------|-----------|----------------|-------------------------------------|------|----|--------------------|
| primary PCR | M2-OF     | 58.9°C         | 5'-atgaaggaataaaacattgctattata-3'   | 20   | 30 | Snounou (2002)     |
|             | M2-OR     | 62.2°C         | 5'-cttgttaccatcggtacattctt-3'       | 37.5 | 24 | Snounou (2002)     |
| nested PCR  |           |                |                                     |      |    |                    |
| FC27 family | S-tail-fw | 54.3°C         | Tail 5'-gcttataatagagtataaggagaa-3' | 28   | 25 | Falk et al. (2006) |
|             | M5-rev    | 52.2°C         | (FAM) 5'-gcattgccagaactgaa-3'       | 47.4 | 19 | Falk et al. (2006) |
| 3D7 family  | S-tail-fw | 54.3°C         | Tail 5'-gcttataatagagtataaggagaa-3' | 28   | 25 | Falk et al. (2006) |
|             | N5-rev    | 60.5°C         | (VIC) 5'-ctgaagaggtactggtaga-3'     | 44.4 | 18 | Falk et al. (2006) |

**Supplementary Table S3: Genotyping data and classification of 7 samples with discrepant *msp1/msp2* result**

| Sample pair | <i>msp1</i>                                                  |                              |                                            | <i>msp2</i>                                  |                                      |                                            | <i>glurp</i> |                     |        | Classification      |                     |
|-------------|--------------------------------------------------------------|------------------------------|--------------------------------------------|----------------------------------------------|--------------------------------------|--------------------------------------------|--------------|---------------------|--------|---------------------|---------------------|
|             | D0                                                           | DX                           | Result                                     | D0                                           | DX                                   | Result                                     | D0           | DX                  | Result | Proposed Approach 1 | Proposed Approach 2 |
| 1           | M211                                                         | K238<br>RO33                 | NI<br>with shift<br>of allelic<br>families | D226<br>D370                                 | D370<br>F417                         | R                                          | 766<br>933   | 766                 | R      | R                   | NI                  |
| 2           | K230<br>K238<br>Ro33                                         | Ro33<br>K212                 | R                                          | D257<br>D298<br>F371                         | D269                                 | NI                                         | 939          | 819<br>884          | NI     | NI                  | R                   |
| 3           | Ro33                                                         | Ro33                         | R                                          | F417                                         | D224                                 | NI<br>with shift<br>of allelic<br>families | 773          | 884                 | NI     | NI                  | NI                  |
| 4           | M219<br>M202<br>K177<br>K203<br>K212<br>K230<br>K284<br>Ro33 | M219<br><br>K212<br><br>Ro33 | R                                          | D226<br>D234<br>D271<br>D282<br>D291<br>F408 | D241<br>D250<br>D375<br>F337<br>F382 | NI                                         | 602          | 832                 | NI     | NI                  | R                   |
| 5           | K203<br>K212<br>Ro33                                         | Ro33<br>K257                 | R                                          | D286<br>D352                                 | F337                                 | NI<br>with shift<br>of allelic<br>families | 939          | 939<br>1111         | R      | R                   | NI                  |
| 6           | M193<br>M202<br>K239<br>Ro33                                 | Ro33<br>K194<br>K212         | R                                          | D253<br>F371<br>F454                         | D343<br>F348<br>F419                 | NI                                         | 822<br>939   | 831<br>1052<br>1111 | NI     | NI                  | R                   |
| 7           | M193                                                         | M193                         | R                                          | D300<br>F371                                 | F337                                 | NI                                         | 602<br>830   | 602                 | R      | R                   | R                   |
